# Supplementary material
Source: publisher figshare collection journal article supplement (https://acs.figshare.com/ndownloader/files/7362937)

## Supporting Information

### Trimethylsilyl Group-Assisted Stimuli-Response: Self-Assembly of 1,3,6,8-Tetra(trimethylsilylethynyl)pyrene

Feng Xu,<sup>a</sup> Takanori Nishida,<sup>a</sup> Kenta Shinohara,<sup>a</sup> Lifen Peng,<sup>a</sup> Makoto Takezaki,<sup>a</sup> Takahiro Kamada,<sup>b</sup> Haruo Akashi,<sup>b</sup> Hiromu Nakamura,<sup>c</sup> Kouki Sugiyama,<sup>c</sup> Kazuchika Ohta,<sup>c</sup> Akihiro Orita<sup>\*a</sup> and Junzo Otera<sup>a</sup>

<sup>a</sup>Department of Applied Chemistry and Biotechnology, Okayama University of Science, 1-1 Ridai-cho, Kita-ku, Okayama 700 0005 Japan, <sup>b</sup>Research Institute of Natural Sciences, Okayama University of Science, 1-1 Ridai-cho, Kita-ku, Okayama 700 0005 Japan, <sup>c</sup>Smart Material Science and Technology, Interdisciplinary Graduate School of Science and Technology, Shinshu University 1-15-1 Tokida, Ueda, 386 8567 Japan

#### Table of contents

|                                                                                                                               |     |
|-------------------------------------------------------------------------------------------------------------------------------|-----|
| 1. General consideration                                                                                                      | S4  |
| 2. Structure of <b>Y-form</b>                                                                                                 | S4  |
| <b>Figure S1.</b> ORTEP diagram of <b>Y-form</b>                                                                              | S4  |
| <b>Figure S2.</b> Packing structures of <b>Y-form</b>                                                                         | S5  |
| <b>Table S1.</b> Crystal data and structure refinements for <b>Y-form</b>                                                     | S6  |
| 3. XRD profiles of <b>O<sub>C</sub>-</b> , <b>O<sub>A</sub>-</b> and <b>O<sub>K</sub>-forms</b>                               | S10 |
| <b>Figure S3.</b> XRD profile of <b>O<sub>C</sub>-form</b>                                                                    | S10 |
| <b>Table S2.</b> X-ray diffraction data of <b>O<sub>C</sub>-form</b>                                                          | S10 |
| <b>Figure S4.</b> Lattice constants [Å] of <b>O<sub>C</sub>-form</b>                                                          | S11 |
| <b>Figure S5.</b> XRD profile of <b>O<sub>A</sub>-form</b>                                                                    | S11 |
| <b>Figure S6.</b> XRD profile of <b>O<sub>K</sub>-form</b>                                                                    | S12 |
| <b>Table S3.</b> X-ray diffraction data of <b>O<sub>K</sub>-form</b>                                                          | S12 |
| <b>Figure S7.</b> Lattice constants [Å] of <b>O<sub>K</sub>-form</b>                                                          | S13 |
| 4. Recrystallization/reprecipitation of <b>1</b>                                                                              | S14 |
| <b>Table S4.</b> Conditions and results in recrystallization/reprecipitation of <b>1</b>                                      | S14 |
| <b>Figure S8.</b> PL spectra of <b>Y-forms</b> and <b>O<sub>C</sub>-forms</b> obtained from recrystallization/reprecipitation | S14 |
| 5. DSC measurements of <b>1</b>                                                                                               | S15 |
| <b>Figure S9.</b> DSC profiles of <b>Y-form</b>                                                                               | S15 |
| <b>Figure S10.</b> DSC profiles of <b>O<sub>A</sub>-form</b>                                                                  | S16 |
| 6. Thermochromism of <b>1</b>                                                                                                 | S17 |
| <b>Scheme S1.</b> Summary of thermochromism of <b>1</b>                                                                       | S17 |
| 6.1 Thermal phase transition of <b>Y-form</b> to <b>O<sub>C</sub>-form</b>                                                    | S17 |

|                                                                                                                                                                                          |     |
|------------------------------------------------------------------------------------------------------------------------------------------------------------------------------------------|-----|
| <b>Figure S11.</b> Pictures of <b>Y-</b> and <b>O<sub>C</sub>-forms</b> in thermochromic phase transition                                                                                | S17 |
| <b>Figure S12.</b> PL spectrum of <b>O<sub>C</sub>-form</b> which was obtained by heating <b>Y-form</b>                                                                                  | S17 |
| 6.2 Thermal phase transition of <b>O<sub>A</sub>-form</b> to <b>O<sub>K</sub>-form</b>                                                                                                   | S18 |
| <b>Figure S13.</b> Pictures of <b>O<sub>C</sub>-</b> , <b>O<sub>K</sub>-</b> and <b>O<sub>A</sub>-forms</b> under sunlight and UV-light                                                  | S18 |
| <b>Figure S14.</b> PL profiles of <b>O<sub>C</sub>-</b> , <b>O<sub>K</sub>-</b> and <b>O<sub>A</sub>-forms</b>                                                                           | S18 |
| 7. Vapochromism                                                                                                                                                                          | S19 |
| <b>Scheme S2.</b> Summary of vapochromism of <b>1</b>                                                                                                                                    | S19 |
| 7.1 Acetone-promoted phase transition of <b>O<sub>C</sub>-</b> , <b>O<sub>A</sub>-</b> and <b>O<sub>K</sub>-forms</b> to <b>Y-form</b>                                                   | S19 |
| <b>Figure S15.</b> Apparatus for vapochromic phase transition                                                                                                                            | S19 |
| <b>Figure S16.</b> PL profiles of <b>Y-forms</b> which were obtained by vapochromic phase transition from <b>O<sub>C</sub>-</b> , <b>O<sub>A</sub>-</b> and <b>O<sub>K</sub>-forms</b>   | S20 |
| 7. 1.1 Vapochromic phase transition from <b>O<sub>C</sub>-form</b> to <b>Y-form</b>                                                                                                      | S21 |
| <b>Figure S17.</b> Pictures of <b>O<sub>C</sub>-</b> and <b>Y-forms</b> in acetone-promoted vapochromism                                                                                 | S21 |
| <b>Figure S18.</b> DSC profiles of <b>Y-form</b> obtained from <b>O<sub>C</sub>-form</b> by acetone-promoted phase transition                                                            | S21 |
| 7. 1.2 Vapochromic phase transition from <b>O<sub>A</sub>-form</b> to <b>Y-form</b>                                                                                                      | S22 |
| <b>Figure S19.</b> Pictures of <b>O<sub>A</sub>-</b> and <b>Y-forms</b> in acetone-promoted vapochromism                                                                                 | S22 |
| <b>Figure S20.</b> DSC profiles of <b>Y-form</b> obtained from <b>O<sub>A</sub>-form</b> by acetone-promoted phase transition                                                            | S22 |
| 7. 1.3 Vapochromic phase transition from <b>O<sub>K</sub>-form</b> to <b>Y-form</b>                                                                                                      | S23 |
| <b>Figure S21.</b> Pictures of <b>O<sub>K</sub>-</b> and <b>Y-forms</b> in acetone-promoted vapochromism                                                                                 | S23 |
| <b>Figure S22.</b> DSC profiles of <b>Y-form</b> obtained from <b>O<sub>K</sub>-form</b> by acetone-promoted phase transition                                                            | S23 |
| 7.2 Hexane-promoted phase transition of <b>O<sub>A</sub>-</b> and <b>O<sub>K</sub>-forms</b> to <b>O<sub>C</sub>-form</b>                                                                | S24 |
| <b>Figure S23.</b> PL spectra of authentic <b>O<sub>C</sub>-form</b> and <b>O<sub>C</sub>-form</b> obtained from <b>O<sub>A</sub>-form</b>                                               | S24 |
| <b>Figure S24.</b> PL spectra of authentic <b>O<sub>C</sub>-form</b> and <b>O<sub>C</sub>-form</b> obtained from <b>O<sub>K</sub>-form</b>                                               | S25 |
| <b>Figure S25.</b> PL spectra of authentic <b>Y-form</b> and <b>Y-form</b> exposed to hexane vapor                                                                                       | S25 |
| 8. Mechanochromism of <b>1</b>                                                                                                                                                           | S26 |
| <b>Scheme S3.</b> Summary of mechanochromism of <b>1</b>                                                                                                                                 | S26 |
| <b>Figure S26.</b> Pictures of <b>Y-</b> and <b>O<sub>A</sub>-forms</b> in grinding-promoted mechanochromism                                                                             | S26 |
| <b>Figure S27.</b> PL spectra of <b>O<sub>A</sub>-forms</b> which were obtained by mechanochromic phase transition from <b>Y-</b> , <b>O<sub>C</sub>-</b> and <b>O<sub>K</sub>-forms</b> | S27 |
| 9. Fluorescence life time                                                                                                                                                                | S28 |
| <b>Figure S28.</b> Fluorescence decay profiles of <b>1</b>                                                                                                                               | S28 |
| <b>Table S5.</b> Summary of emission lifetime, PL quantum yield and rate constants                                                                                                       | S29 |
| 10. Thermogravimetry analysis (TGA)                                                                                                                                                      | S30 |
| <b>Figure S29.</b> TGA thermogram of <b>O<sub>C</sub>-form</b>                                                                                                                           | S30 |
| 11. UV—Vis absorption and PL spectra of <b>1</b> in CH <sub>2</sub> Cl <sub>2</sub>                                                                                                      | S30 |
| <b>Figure S30.</b> UV—Vis absorption spectra of <b>1</b> in CH <sub>2</sub> Cl <sub>2</sub> (10 <sup>-4</sup> to 10 <sup>-5</sup> mol/L)                                                 | S30 |
| <b>Figure S31.</b> PL spectra of <b>1</b> in CH <sub>2</sub> Cl <sub>2</sub> (10 <sup>-2</sup> to 10 <sup>-5</sup> mol/L)                                                                | S31 |
| 12. Microscopic observations of <b>O<sub>C</sub>-form</b> on heating                                                                                                                     | S31 |

|                                                                                       |     |
|---------------------------------------------------------------------------------------|-----|
| <b>Figure S32.</b> Microscopic observations of <b>O<sub>C</sub>-form</b> on heating   | S31 |
| 13. XRD analyses and microscopic observations of <b>O<sub>K</sub>-form</b> on heating | S32 |
| <b>Figure S33.</b> XRD profiles of <b>O<sub>K</sub>-form</b> on heating               | S32 |
| <b>Figure S34.</b> Microscopic observations of <b>O<sub>K</sub>-form</b> on heating   | S33 |
| 14. References of Supporting Information and NMR charts of <b>1</b>                   | S34 |
| <b>Figure S35.</b> NMR charts of <b>1</b> (CDCl <sub>3</sub> )                        | S35 |

**1. General Considerations:** Unless otherwise stated, all reactions were carried out under an argon atmosphere. Anhydrous tetrahydrofuran (THF) was purchased and used without further purification. Toluene and *i*-Pr<sub>2</sub>NH were distilled from CaH<sub>2</sub> prior to use. All NMR spectra were recorded at ambient temperature (ca. 20 °C) on JEOL LAMBDA 300 and LAMBDA 500 and ECS-400 NMR spectrometers, and referenced to an internal standard tetramethylsilane. MALDI-TOF MS was recorded on BRUKER autoflex speed. UV-vis absorption and emission spectra were measured in degassed solvents at 25 °C. Absolute photoluminescence quantum yield was measured by integrated sphere system. The phase transition sequences for **1** were revealed by using a polarizing optical microscope (Nikon ECLIPSE E600 POL) equipped with a heating plate (Mettler FP82HT hot stage, Mettler FP-90 Central Processor) and a differential scanning calorimeter (Shimadzu DSC-50). The decomposition temperatures were measured by a Rigaku Thermo plus TG 820 thermogravimetry analyser. The identification of the mesophases was performed by using a small angle X-ray diffractometer (Bruker Mac SAXS System: Cu-K $\alpha$  radiation) equipped with a heating plate (Mettler FP82HT hot stage, Mettler FP-90 Central Processor).

Compound **1** was prepared according to the reported procedure.<sup>S1</sup> **Y**- and **O<sub>C</sub>**-forms were obtained by recrystallization from acetone and reprecipitation from hexane, respectively. **O<sub>A</sub>**-form was obtained by grinding **Y**- or **O<sub>C</sub>**-form by mortar and pestle. **O<sub>K</sub>**-form was obtained by heating **O<sub>A</sub>**-form at 150 °C for 2 h.

## 2. Structure of Y-form

**Figure S1.** ORTEP diagram of **Y**-form

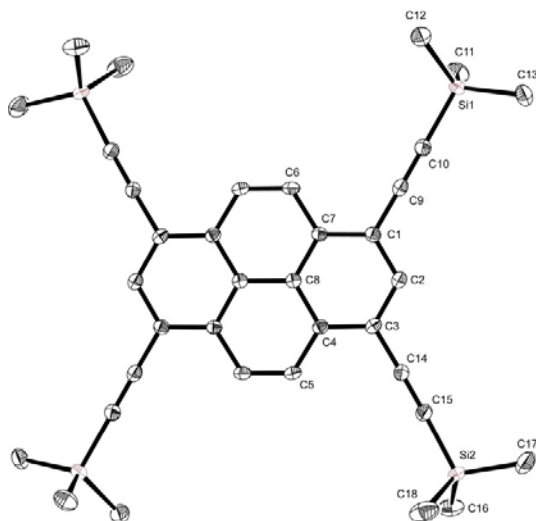

The crystallographically independent atoms are labeled.

Formula: C<sub>36</sub> H<sub>42</sub> Si<sub>4</sub>

Unit Cell Parameters: a 6.3160(18) b 10.023(3) c 15.378(5) P-1

CCDC 1490712

**Figure S2.** Packing structures of **Y-form**

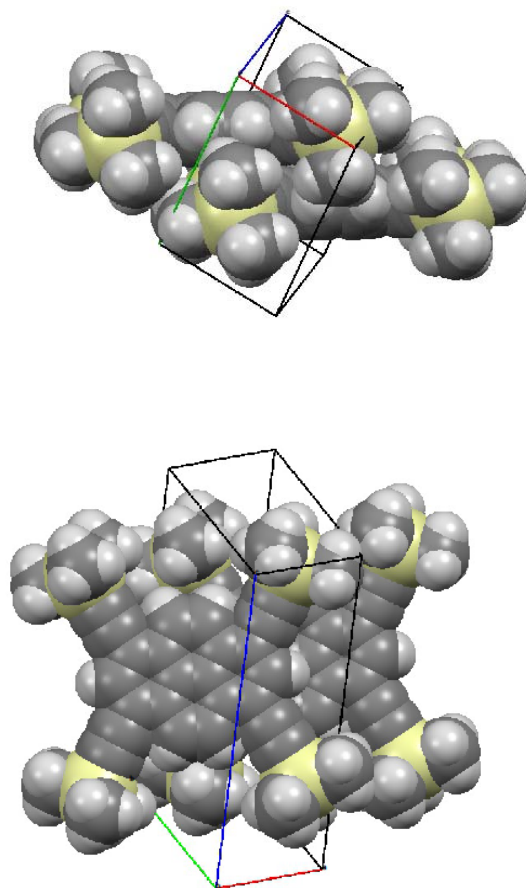

**Table S1.** Crystal data and structure refinements for **Y-form**

## A. Crystal Data

|                       |                                                                                                                                                                    |
|-----------------------|--------------------------------------------------------------------------------------------------------------------------------------------------------------------|
| Empirical Formula     | C <sub>36</sub> H <sub>42</sub> Si <sub>4</sub>                                                                                                                    |
| Formula Weight        | 587.07                                                                                                                                                             |
| Crystal Color, Habit  | yellow, platelet                                                                                                                                                   |
| Crystal Dimensions    | 0.450 X 0.060 X 0.010 mm                                                                                                                                           |
| Crystal System        | triclinic                                                                                                                                                          |
| Lattice Type          | Primitive                                                                                                                                                          |
| Lattice Parameters    | a = 6.316(2) Å<br>b = 10.023(3) Å<br>c = 15.378(5) Å<br>$\alpha$ = 70.431(9) °<br>$\beta$ = 81.290(12) °<br>$\gamma$ = 80.513(13) °<br>V = 899.9(5) Å <sup>3</sup> |
| Space Group           | P-1 (#2)                                                                                                                                                           |
| Z value               | 1                                                                                                                                                                  |
| D <sub>calc</sub>     | 1.083 g/cm <sup>3</sup>                                                                                                                                            |
| F <sub>000</sub>      | 314.00                                                                                                                                                             |
| $\mu$ (MoK $\alpha$ ) | 1.865 cm <sup>-1</sup>                                                                                                                                             |

## B. Intensity Measurements

|                            |                                                                                      |
|----------------------------|--------------------------------------------------------------------------------------|
| Diffractometer             | Saturn724                                                                            |
| Radiation                  | MoK $\alpha$ ( $\lambda = 0.71075 \text{ \AA}$ )<br>multi-layer mirror monochromated |
| Voltage, Current           | 50kV, 24mA                                                                           |
| Temperature                | -179.8°C                                                                             |
| Detector Aperture          | 70 x 70 mm                                                                           |
| Data Images                | 2520 exposures                                                                       |
| $\omega$ oscillation Range | -110.0 - 70.0°                                                                       |
| Exposure Rate              | 8.0 sec./°                                                                           |
| Detector Swing Angle       | -19.51°                                                                              |
| $\omega$ oscillation Range | -110.0 - 70.0°                                                                       |
| Exposure Rate              | 8.0 sec./°                                                                           |
| Detector Swing Angle       | -19.51°                                                                              |
| $\omega$ oscillation Range | -110.0 - 70.0°                                                                       |
| Exposure Rate              | 8.0 sec./°                                                                           |
| Detector Swing Angle       | -19.51°                                                                              |
| $\omega$ oscillation Range | -110.0 - 70.0°                                                                       |
| Exposure Rate              | 8.0 sec./°                                                                           |
| Detector Swing Angle       | -19.51°                                                                              |

|                             |                                                                       |
|-----------------------------|-----------------------------------------------------------------------|
| $\omega$ oscillation Range  | -110.0 - 70.0 $^{\circ}$                                              |
| Exposure Rate               | 8.0 sec./ $^{\circ}$                                                  |
| Detector Swing Angle        | -19.51 $^{\circ}$                                                     |
| $\omega$ oscillation Range  | -110.0 - 55.0 $^{\circ}$                                              |
| Exposure Rate               | 8.0 sec./ $^{\circ}$                                                  |
| Detector Swing Angle        | -19.51 $^{\circ}$                                                     |
| $\omega$ oscillation Range  | -76.0 - 59.0 $^{\circ}$                                               |
| Exposure Rate               | 8.0 sec./ $^{\circ}$                                                  |
| Detector Swing Angle        | -19.51 $^{\circ}$                                                     |
| $\omega$ oscillation Range  | -110.0 - -50.0 $^{\circ}$                                             |
| Exposure Rate               | 8.0 sec./ $^{\circ}$                                                  |
| Detector Swing Angle        | -19.51 $^{\circ}$                                                     |
| Detector Position           | 45.04 mm                                                              |
| Pixel Size                  | 0.141 mm                                                              |
| $2\theta_{\max}$            | 60.1 $^{\circ}$                                                       |
| No. of Reflections Measured | Total: 24975<br>Unique: 4111 ( $R_{\text{int}} = 0.0476$ )            |
| Corrections                 | Lorentz-polarization<br>Absorption<br>(trans. factors: 0.887 - 0.998) |



### C. Structure Solution and Refinement

|                                       |                                                                                                                      |
|---------------------------------------|----------------------------------------------------------------------------------------------------------------------|
| Structure Solution                    | Direct Methods                                                                                                       |
| Refinement                            | Full-matrix least-squares on $F^2$                                                                                   |
| Function Minimized                    | $\Sigma w (F_o^2 - F_c^2)^2$                                                                                         |
| Least Squares Weights                 | $w = 1 / [ \sigma^2(F_o^2) + (0.0394 \cdot P)^2 + 0.9802 \cdot P ]$<br>where $P = (\text{Max}(F_o^2, 0) + 2F_c^2)/3$ |
| $2\theta_{\text{max}}$ cutoff         | 55.0°                                                                                                                |
| Anomalous Dispersion                  | All non-hydrogen atoms                                                                                               |
| No. Observations (All reflections)    | 4111                                                                                                                 |
| No. Variables                         | 181                                                                                                                  |
| Reflection/Parameter Ratio            | 22.71                                                                                                                |
| Residuals: R1 ( $I > 2.00\sigma(I)$ ) | 0.0545                                                                                                               |
| Residuals: R (All reflections)        | 0.0621                                                                                                               |
| Residuals: wR2 (All reflections)      | 0.1218                                                                                                               |
| Goodness of Fit Indicator             | 1.098                                                                                                                |
| Max Shift/Error in Final Cycle        | 0.001                                                                                                                |
| Maximum peak in Final Diff. Map       | 0.45 e <sup>-</sup> /Å <sup>3</sup>                                                                                  |
| Minimum peak in Final Diff. Map       | -0.25 e <sup>-</sup> /Å <sup>3</sup>                                                                                 |

### 3. XRD profiles of O<sub>C</sub>-, O<sub>A</sub>- and O<sub>K</sub>-forms

**Figure S3.** XRD profile of O<sub>C</sub>-form

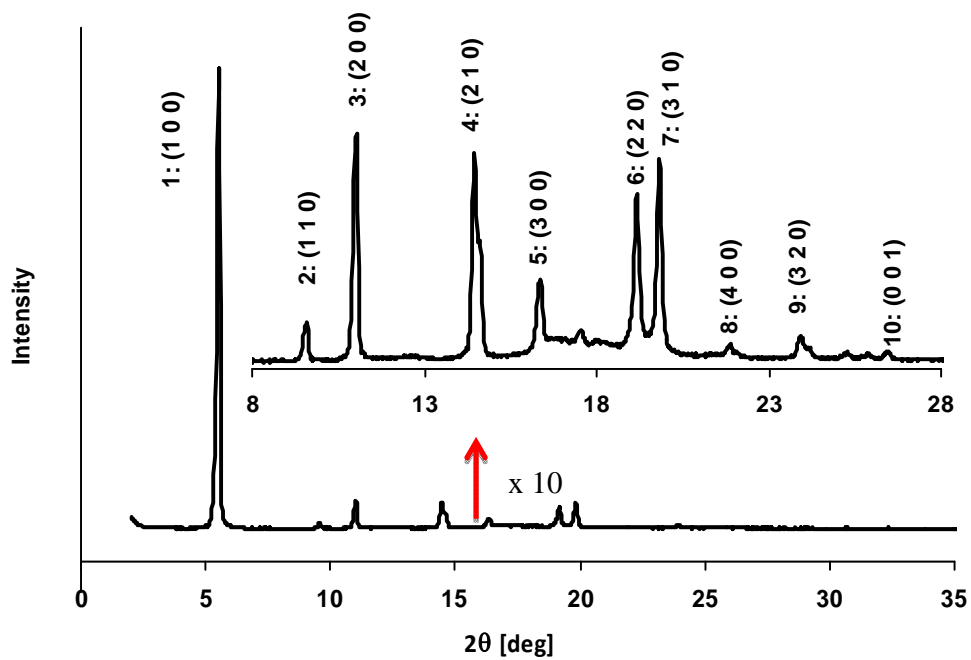

**Table S2.** X-ray diffraction data of O<sub>C</sub>-form

| Peak no. | Spacing  |          |           | Miller indices<br>( <i>h k l</i> ) |
|----------|----------|----------|-----------|------------------------------------|
|          | 2θ [deg] | Obsd [Å] | calcd [Å] |                                    |
| 1        | 5.52     | 16.0     | 16.0      | (1 0 0)                            |
| 2        | 9.59     | 9.21     | 9.26      | (1 1 0)                            |
| 3        | 11.02    | 8.20     | 8.02      | (2 0 0)                            |
| 4        | 14.46    | 6.12     | 6.06      | (2 1 0)                            |
| 5        | 16.37    | 5.41     | 5.35      | (3 0 0)                            |
| 6        | 19.17    | 4.63     | 4.63      | (2 2 0)                            |
| 7        | 19.82    | 4.47     | 4.45      | (3 1 0)                            |
| 8        | 21.88    | 4.08     | 4.01      | (4 0 0)                            |
| 9        | 23.92    | 3.72     | 3.68      | (3 2 0)                            |
| 10       | 26.45    | 3.37     | --        | (0 0 1)                            |

**Figure S4.** Lattice constants [ $\text{\AA}$ ] of **O<sub>C</sub>-form**

| $a$  | $h$  | $Z$                         |
|------|------|-----------------------------|
| 18.5 | 3.37 | 1.0 for<br>( $\rho = 1.0$ ) |

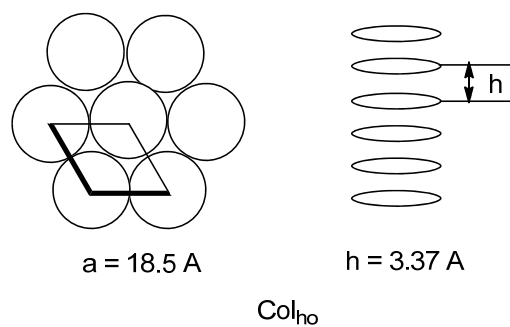

**Figure S5.** XRD profile of **O<sub>A</sub>-form**

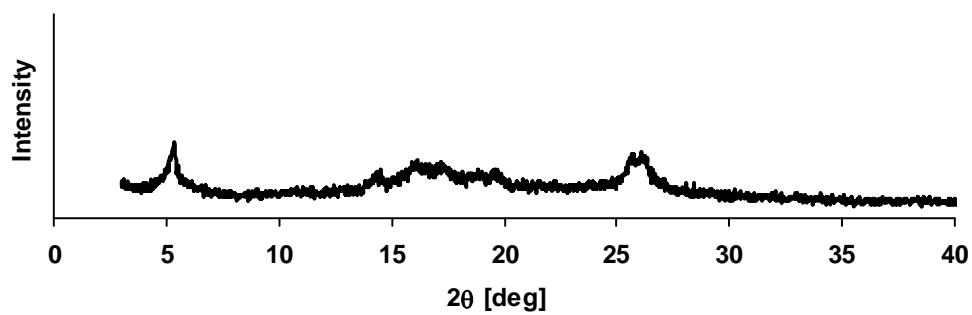

**Figure S6.** XRD profile of **O<sub>K</sub>-form**

**O<sub>K</sub>-form** was prepared by heating **O<sub>A</sub>-form** at 265 °C and subjected to XRD analysis.

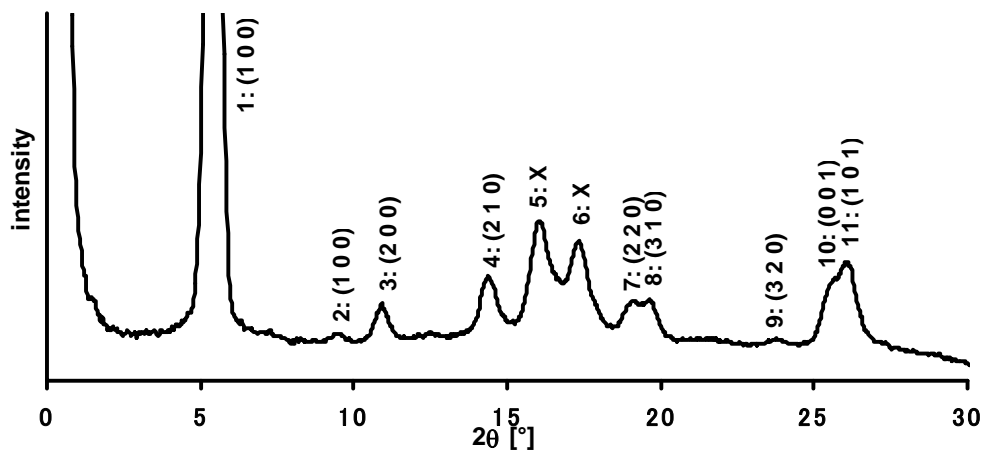

**Table S3.** X-ray diffraction data of **O<sub>K</sub>-form**

| Peak no. | Spacing  |          |           | Miller indices<br>( <i>h k l</i> ) |
|----------|----------|----------|-----------|------------------------------------|
|          | 2θ [deg] | Obsd [Å] | calcd [Å] |                                    |
| 1        | 5.42     | 16.34    | 16.31     | (1 0 0)                            |
| 2        | 9.50     | 9.35     | 9.42      | (1 1 0)                            |
| 3        | 10.92    | 8.11     | 8.16      | (2 0 0)                            |
| 4        | 14.36    | 6.16     | 6.16      | (2 1 0)                            |
| 5        | 16.06    | 5.51     | ---       | X                                  |
| 6        | 17.34    | 5.11     | ---       | X                                  |
| 7        | 19.14    | 4.65     | 4.71      | (2 2 0)                            |
| 8        | 19.64    | 4.52     | 4.52      | (3 1 0)                            |
| 9        | 23.74    | 3.74     | 3.74      | (3 2 0)                            |
| 10       | 25.70    | 3.47     | ---       | (0 0 1)                            |
| 11       | 26.06    | 3.42     | ---       | (1 0 1)                            |

$$\frac{1}{d_{101}^2} = \frac{1^2}{a^2} + \frac{1^2}{c^2}, \quad (a = 18.8 \text{ Å}, c = 3.47 \text{ Å})$$

$$d_{101} = 3.39 \text{ Å (calcd)}, 3.42 \text{ Å (observed)}$$

**Figure S7.** Lattice constants [ $\text{\AA}$ ] of **O<sub>K</sub>-form**

| $a$         | $h$         | $Z$                                          |
|-------------|-------------|----------------------------------------------|
| <b>18.8</b> | <b>3.47</b> | <b>1.1 for<br/>(<math>\rho = 1.0</math>)</b> |

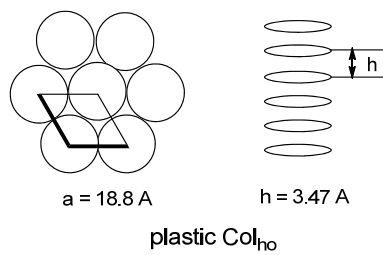

#### 4. Recrystallization/reprecipitation of **1**

**Table S4.** Conditions and results in recrystallization/reprecipitation of **1**

| Solvent used for recrystallization/reprecipitation                                                                                                                                                                                                                                                           | Form                      |
|--------------------------------------------------------------------------------------------------------------------------------------------------------------------------------------------------------------------------------------------------------------------------------------------------------------|---------------------------|
| Acetone <sup>a</sup>                                                                                                                                                                                                                                                                                         | <b>Y-form</b>             |
| ethyl acetate <sup>a</sup>                                                                                                                                                                                                                                                                                   | <b>Y-form</b>             |
| CH <sub>2</sub> Cl <sub>2</sub> /CH <sub>3</sub> CN <sup>c</sup>                                                                                                                                                                                                                                             | <b>Y-form</b>             |
| CHCl <sub>3</sub> <sup>b</sup>                                                                                                                                                                                                                                                                               | <b>O<sub>C</sub>-form</b> |
| 1,2-dichloroethane <sup>b</sup>                                                                                                                                                                                                                                                                              | <b>O<sub>C</sub>-form</b> |
| Hexane <sup>a</sup>                                                                                                                                                                                                                                                                                          | <b>O<sub>C</sub>-form</b> |
| Heptane <sup>a</sup>                                                                                                                                                                                                                                                                                         | <b>O<sub>C</sub>-form</b> |
| c-hexane <sup>a</sup>                                                                                                                                                                                                                                                                                        | <b>O<sub>C</sub>-form</b> |
| Benzene <sup>b</sup>                                                                                                                                                                                                                                                                                         | <b>O<sub>C</sub>-form</b> |
| Et <sub>2</sub> O <sup>b</sup>                                                                                                                                                                                                                                                                               | <b>O<sub>C</sub>-form</b> |
| THF <sup>b</sup>                                                                                                                                                                                                                                                                                             | <b>O<sub>C</sub>-form</b> |
| <sup>a</sup> Saturated solution was kept in a sealed flask at room temperature. <sup>b</sup> Saturated solution was kept at room temperature, and the solvent was gradually evaporated. <sup>c</sup> A small amount of CH <sub>3</sub> CN was added to a saturated CH <sub>2</sub> Cl <sub>2</sub> solution. |                           |

**Figure S8.** PL spectra of **Y-forms** and **O<sub>C</sub>-forms** obtained from recrystallization/reprecipitation

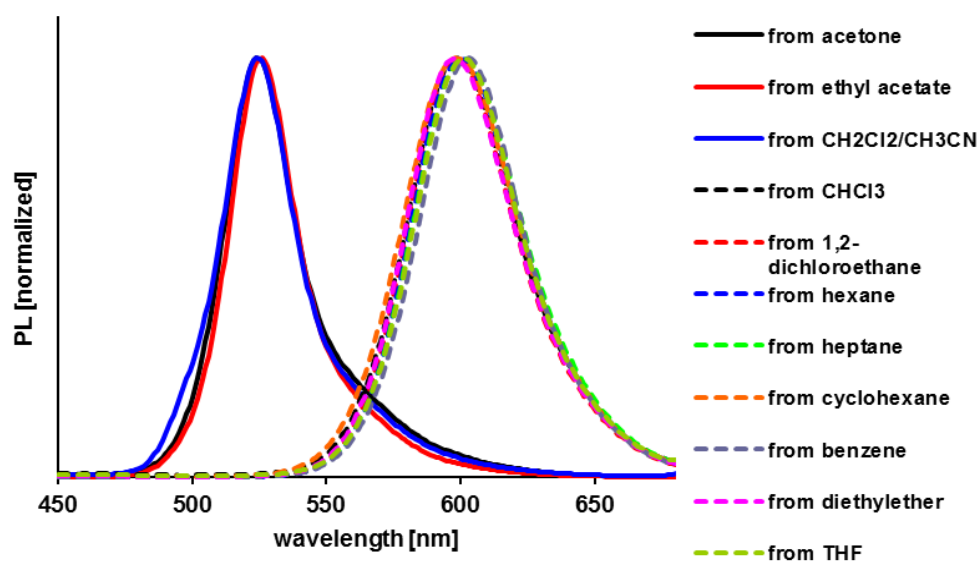

## 5. DSC measurements of **1**

DSC thermograms were recorded using the virgin samples of **1** at 10 °C/min on heating and -10 °C/min on cooling rates.

Figure S9. DSC profiles of **Y-form**

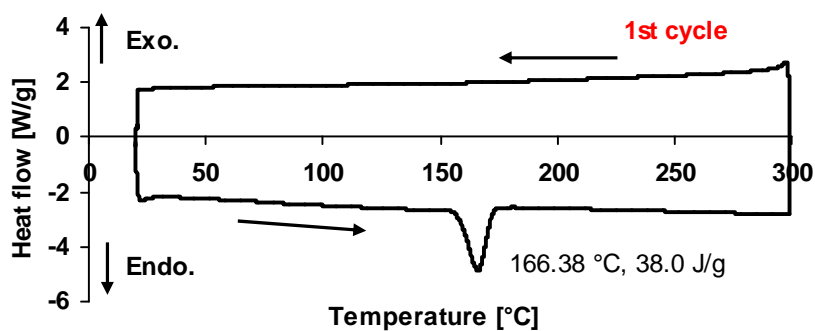

At 166 °C in the first cycle, **Y-form** underwent the phase transition to **O<sub>C</sub>-form**.

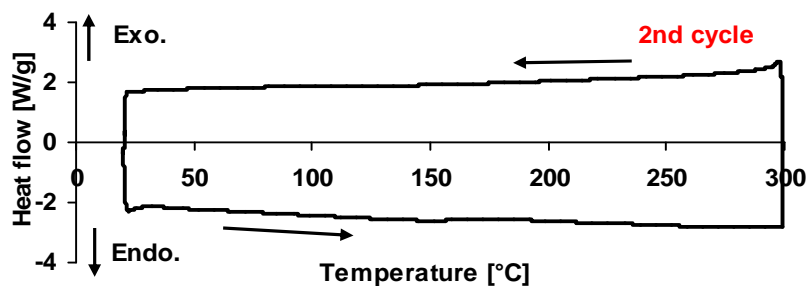

In the second cycle, neither exothermic nor endothermic profile was recorded diagnostic of no phase transition of **O<sub>C</sub>-form**.

Figure S10. DSC profiles of O<sub>A</sub>-form

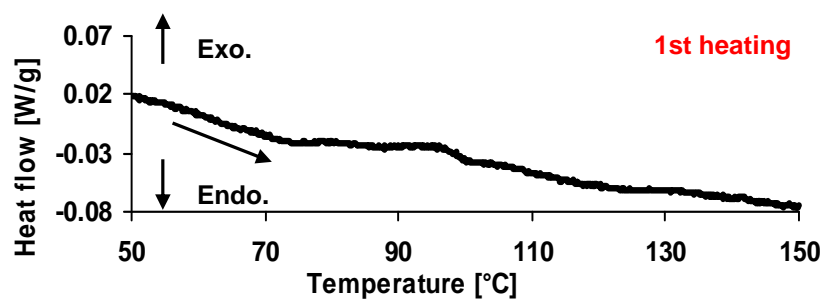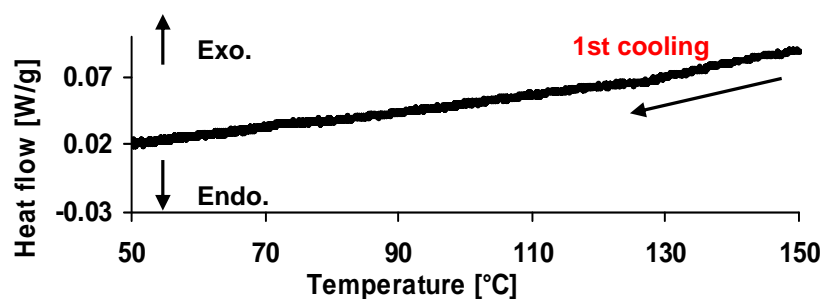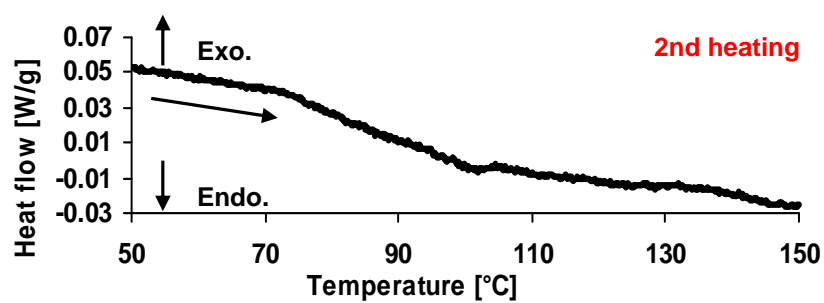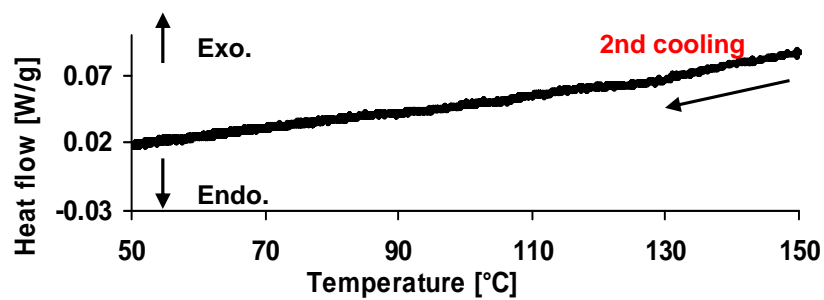



## 6. Thermochromism of 1

Scheme S1. Summary of thermochromism of 1

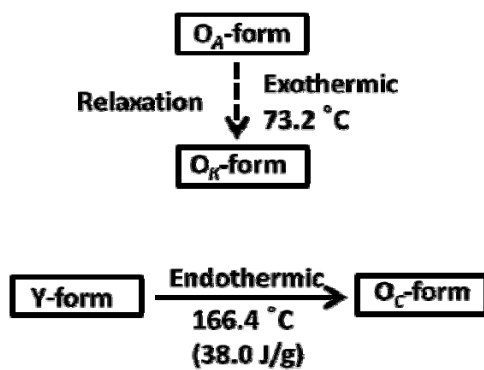

### 6.1 Thermal phase transition of Y-form to O<sub>C</sub>-form

**Y-form 1** was placed on a thin glass plate and heated by a hot plate until the color changed to orange (~250 °C). Phase transitions were confirmed by color and PL profile.

Figure S11. Pictures of Y- and O<sub>C</sub>-forms in thermochromic phase transition

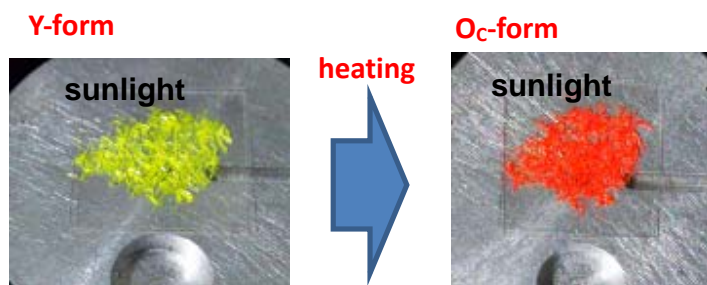

Figure S12. PL spectrum of O<sub>C</sub>-form which was obtained by heating Y-form

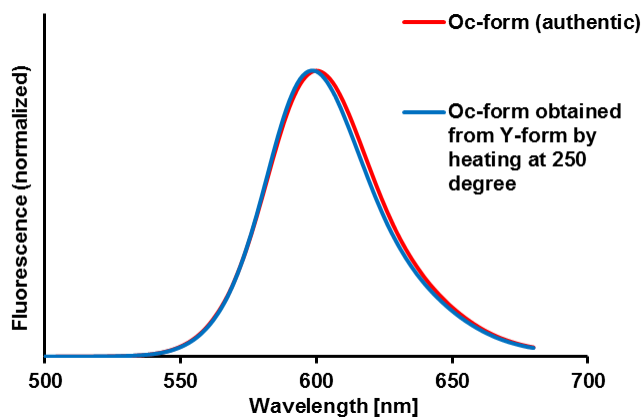

## 6.2 Thermal phase transition of O<sub>A</sub>-form to O<sub>K</sub>-form

O<sub>A</sub>-form was placed on a thin glass plate and heated by a hot plate at 270 °C for 12 h. Phase transition was confirmed by comparison of PL profiles because O-forms showed similar orange colors.

Figure S13. Pictures of O<sub>C</sub>-, O<sub>K</sub>- and O<sub>A</sub>-forms under sunlight and UV-light

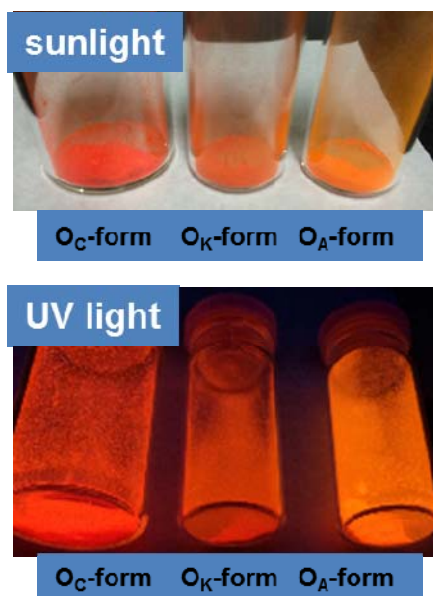

Figure S14. PL profiles of O<sub>C</sub>-, O<sub>K</sub>- and O<sub>A</sub>-forms

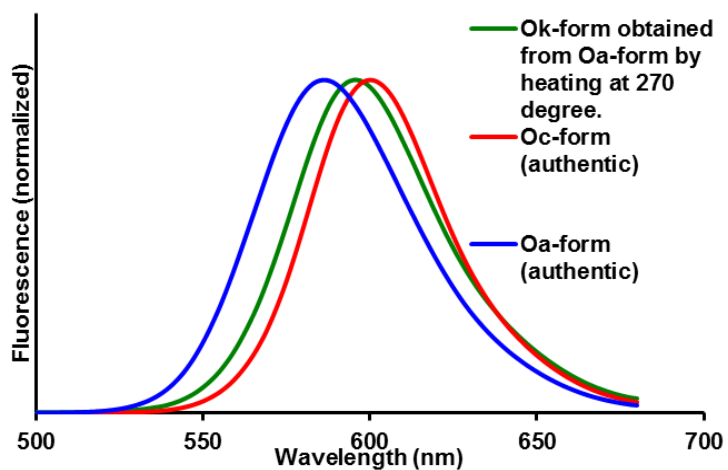

## 7. Vapochromism of 1

Scheme S2. Summary of vapochromism of 1

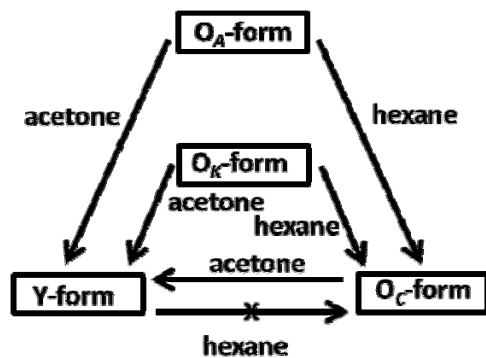

### 7.1 Acetone-promoted phase transition of O<sub>C</sub>-, O<sub>A</sub>- and O<sub>K</sub>-forms to Y-form

In a glass beaker was placed **O<sub>C</sub>-**, **O<sub>A</sub>-** or **O<sub>K</sub>-form**, and a small amount of acetone was added. The beaker was put a lid on by aluminum foil, and kept at rt overnight. Phase transitions were confirmed by color, PL profiles and DSC.

Figure S15. Apparatus for vapochromic phase transition

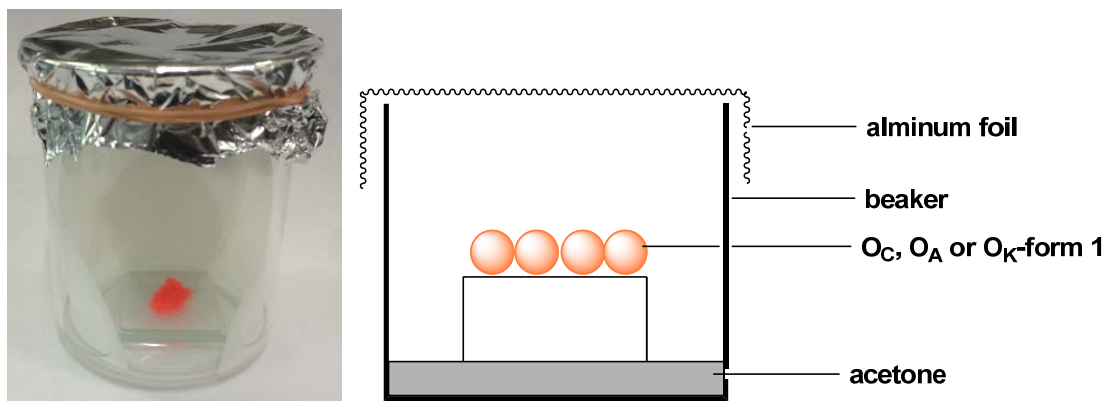

**Figure S16.** PL profiles of **Y-forms** which were obtained by vapochromic phase transition from **O<sub>C</sub>-**, **O<sub>A</sub>-** and **O<sub>K</sub>-forms**.

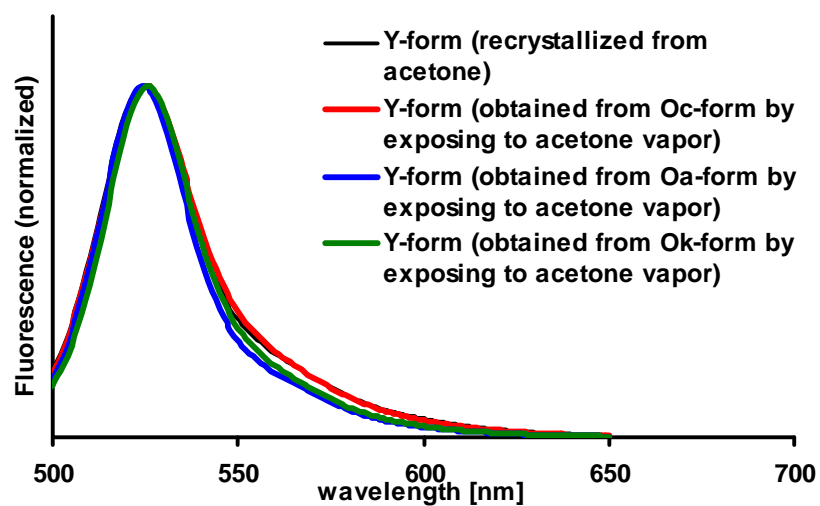

### 7. 1.1 Vapochromic phase transition from **O<sub>C</sub>-form** to **Y-form**

**Figure S17.** Pictures of **O<sub>C</sub>-** and **Y-forms** in acetone-promoted vapochromism

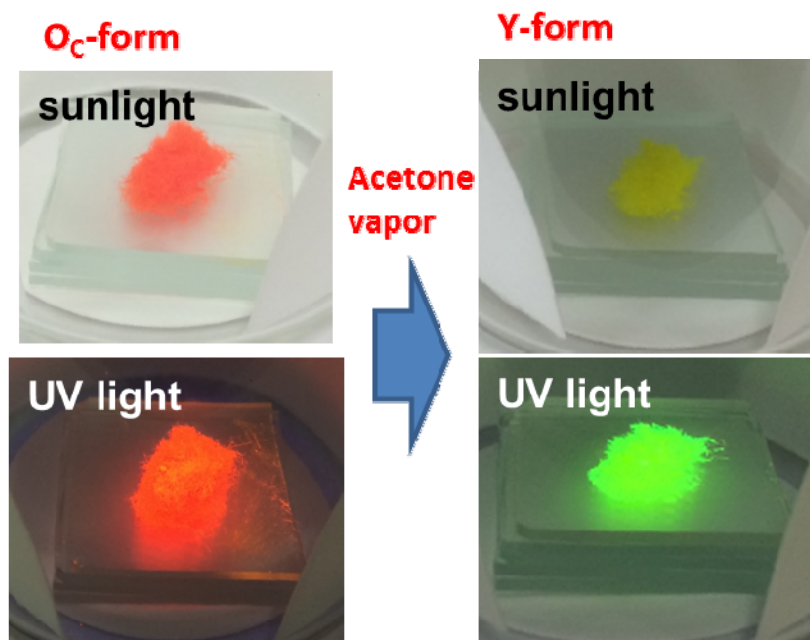

**Figure S18.** DSC profiles of **Y-form** obtained from **O<sub>C</sub>-form** by acetone-promoted phase transition

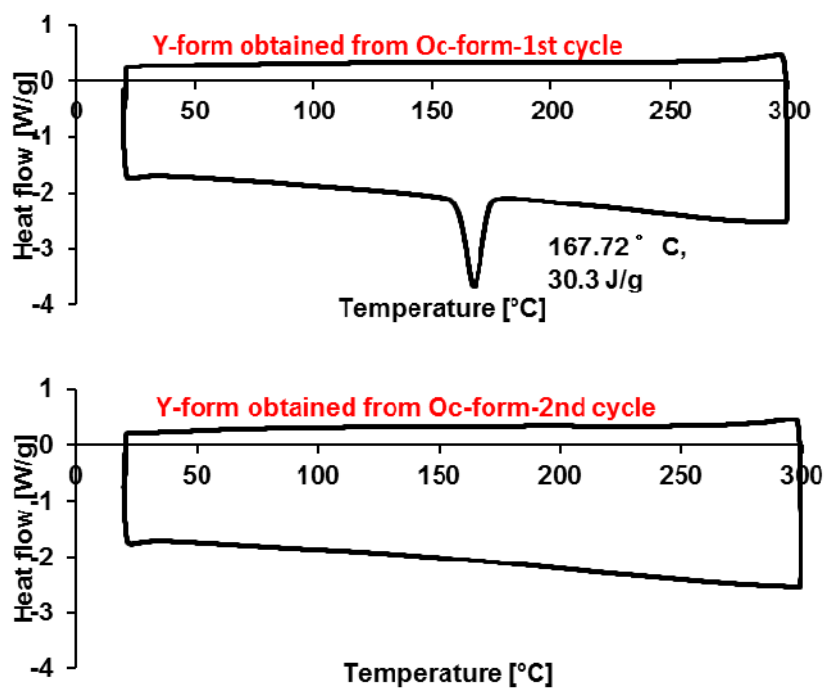

### 7. 1.2 Vapochromic phase transition from **O<sub>A</sub>-form** to **Y-form**

**Figure S19.** Pictures of **O<sub>A</sub>-** and **Y-forms** in acetone-promoted vapochromism

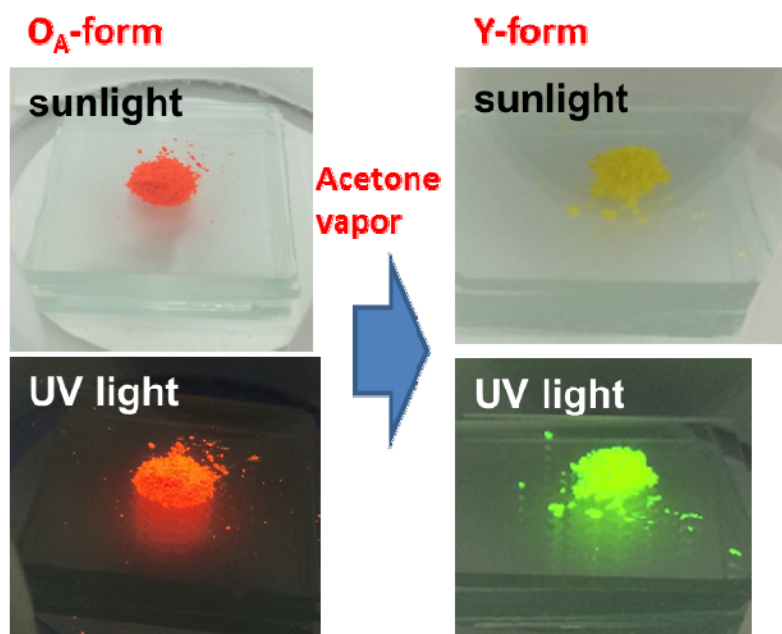

**Figure S20.** DSC profiles of **Y-form** obtained from **O<sub>A</sub>-form** by acetone-promoted phase transition

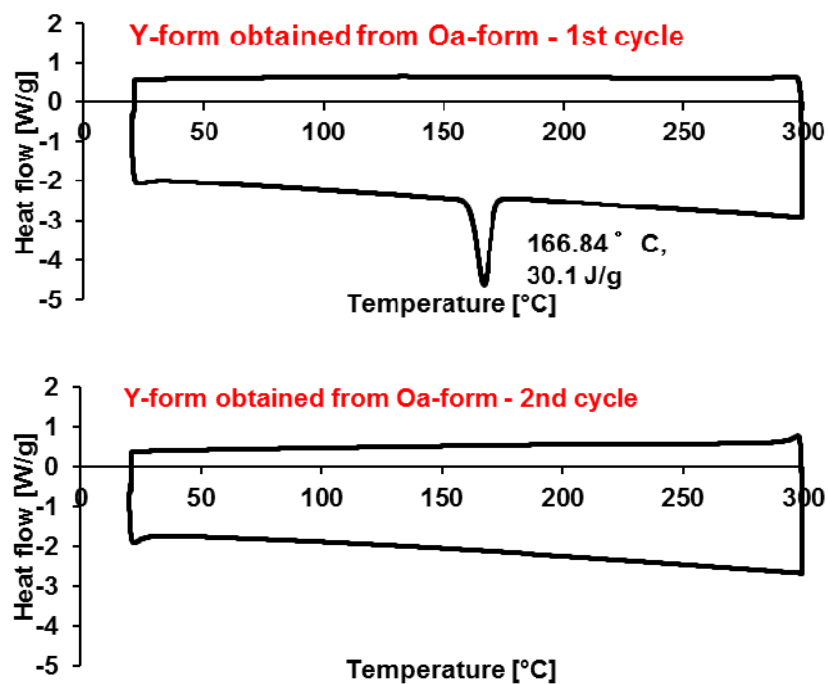

### 7. 1.3 Vapochromic phase transition from $O_K$ -form to Y-form

Figure S21. Pictures of  $O_K$ - and Y-forms in acetone-promoted vapochromism

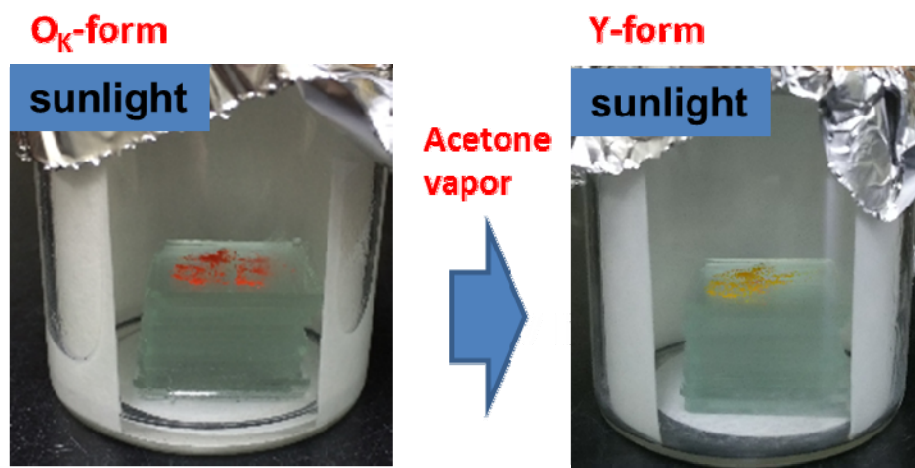

Figure S22. DSC profiles of Y-form obtained from  $O_K$ -form by acetone-promoted phase transition

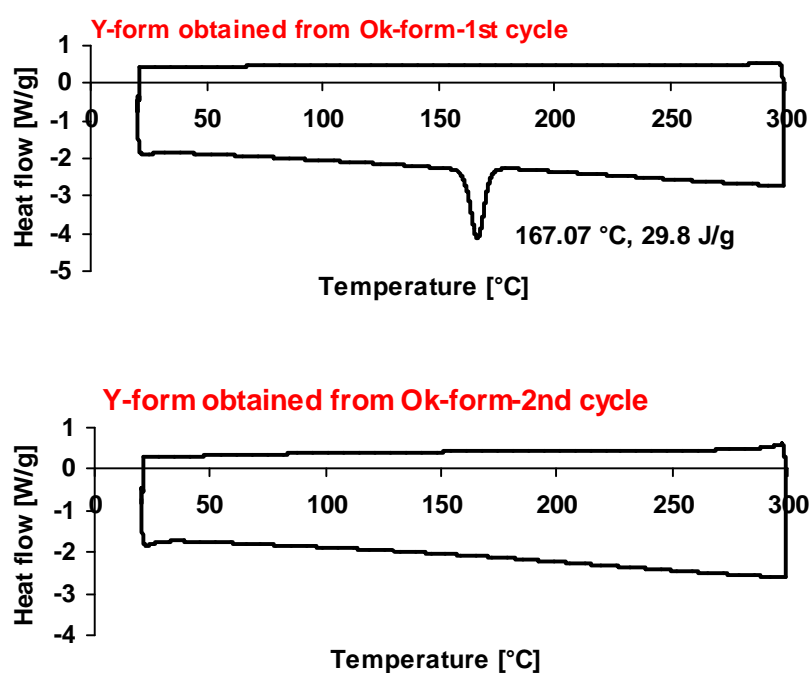

## 7.2 Hexane-promoted phase transition of $O_A$ - and $O_K$ -forms to $O_C$ -form

In a glass beaker was placed  $O_A$ - or  $O_K$ -form, and a small amount of hexane was added. The beaker was put a lid on by aluminum foil, and kept at rt overnight. Phase conversions were confirmed by comparison of PL profiles.

**Figure S23.** PL spectra of authentic  $O_C$ -form and  $O_C$ -form obtained from  $O_A$ -form

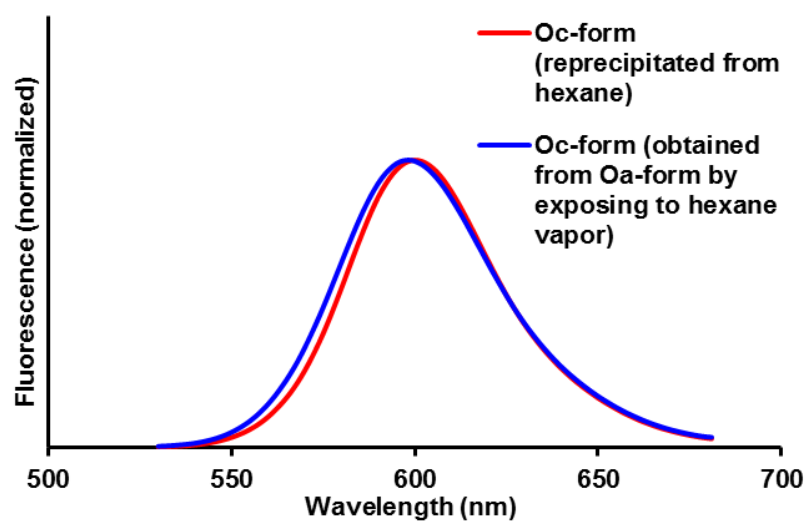



Figure S24. PL spectra of authentic **O<sub>C</sub>-form** and **O<sub>C</sub>-form** obtained from **O<sub>K</sub>-form**

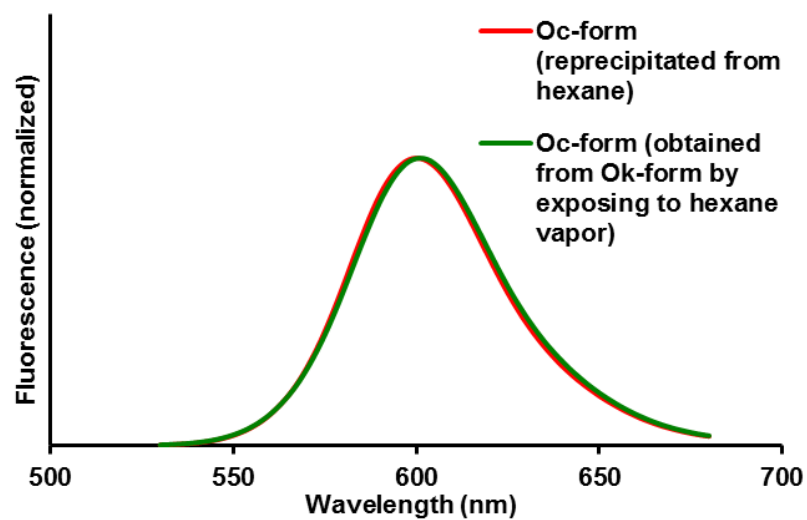

Figure S25. PL spectra of authentic **Y-form** and **Y-form** exposed to hexane vapor

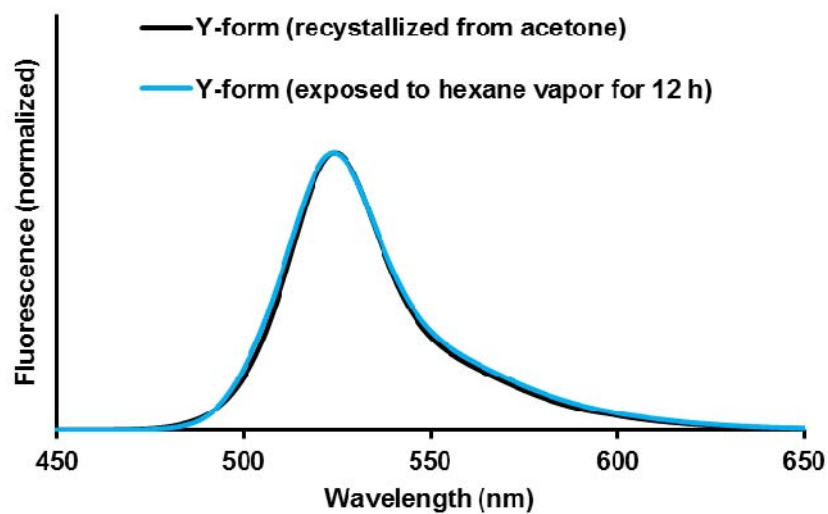

When **Y-form** was exposed to hexane vapor, no color change was observed.

## 8. Mechanochromism of **1**

**Scheme S3.** Summary of mechanochromism of **1**

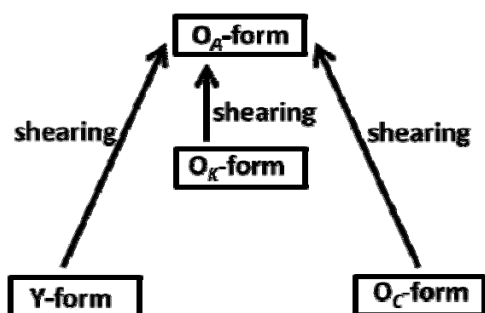

On a mortar was placed **Y**-, **O<sub>C</sub>**- or **O<sub>K</sub>**-form **1**, and **1** was ground by a pestle. Phase transitions were confirmed by color change and comparison of PL profiles.

**Figure S26.** Pictures of **Y**- and **O<sub>A</sub>**-forms in grinding-promoted mechanochromism

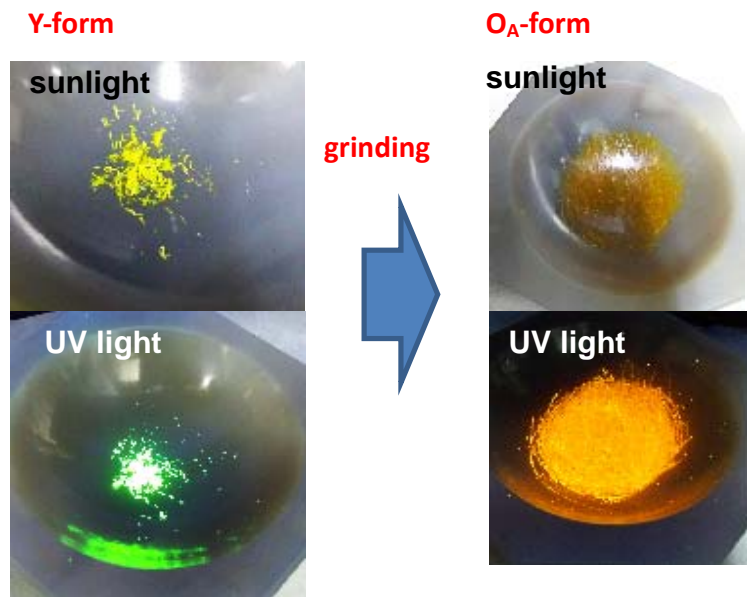

**Figure S27.** PL spectra of **O<sub>A</sub>-forms** which were obtained by mechanochromic phase transition from **Y-**, **O<sub>C</sub>-** and **O<sub>K</sub>-forms**

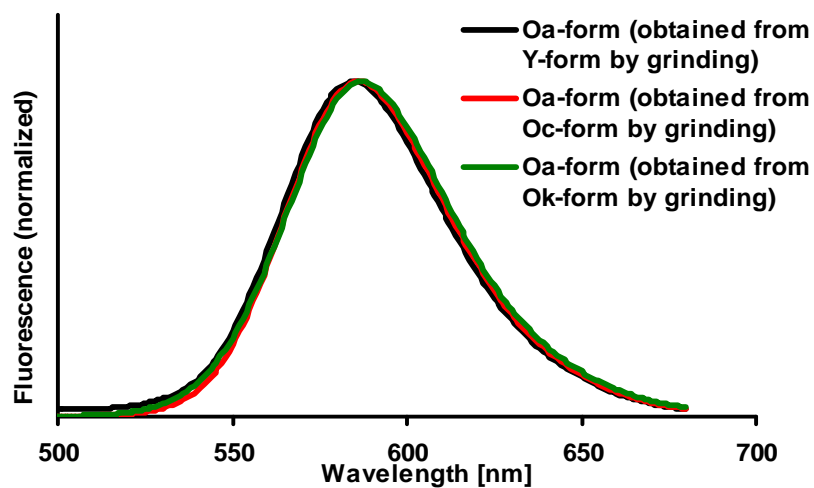

## 9. Fluorescence life time

Fluorescence decays were measured using an apparatus including a femtosecond laser system and a streak camera.<sup>S2</sup> The tetra(trimethylsilylethynyl)pyrene (**1**) was excited using by the SHG light of a femtosecond Ti:Sapphire laser (Spectra-Physics, Tsunami 3960, the wavelength of pulse  $\sim 800$  nm, the full width at half maximum of the pulse  $\sim 80$  fs) pumped by the SHG output of a Nd:YVO<sub>4</sub> laser (Spectra-Physics, Millennia-V). The detected fluorescence was dispersed by a monochromator and measured using a streak scope (Hamamatsu, C4334). The fluorescence signals were averaged using a PC. Fluorescence decay measurements were performed at 22 °C for **1**. The fluorescence decay curve for each form of **1** can be represented by a single exponential decay function,  $I(t) = I_0 \exp(-t/\tau)$  where  $\tau$  is the fluorescence lifetime.

**Figure S28.** Fluorescence decay profiles of **1**

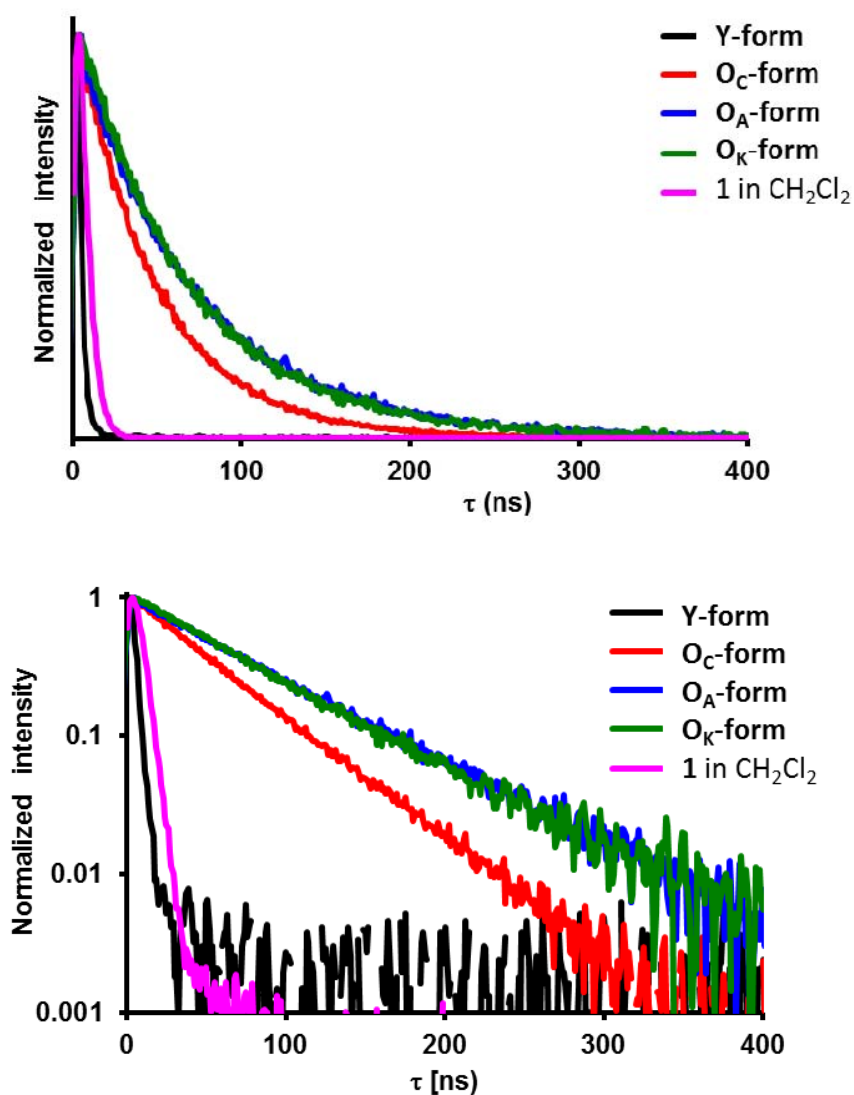

**Table S5.** Summary of emission lifetime, PL quantum yield and rate constants

|                                                  | <b>Y-form</b> | <b>O<sub>A</sub>-form</b> | <b>O<sub>C</sub>-form</b> | <b>O<sub>K</sub>-form</b> | In CH <sub>2</sub> Cl <sub>2</sub> |
|--------------------------------------------------|---------------|---------------------------|---------------------------|---------------------------|------------------------------------|
| $\tau$ (ns)                                      | 2.24          | 70.8                      | 48.6                      | 66.8                      | 3.56                               |
| $\Phi_F$                                         | 0.66          | 0.57                      | 0.49                      | 0.17                      | ---                                |
| $k_r/k_{nr}$<br>( $\times 10^6 \text{ s}^{-1}$ ) | 300/155       | 8.1/6.1                   | 10.1/10.5                 | 2.6/12.4                  | ---                                |

The rate constants  $k_r$  and  $k_{nr}$  were calculated by using the following equations.

$$k_r = \Phi_F/\tau, \quad k_{nr} = (1-\Phi_F)/\tau$$

## 10. Thermogravimetry analysis (TGA)

Figure S29. TGA thermogram of O<sub>C</sub>-form

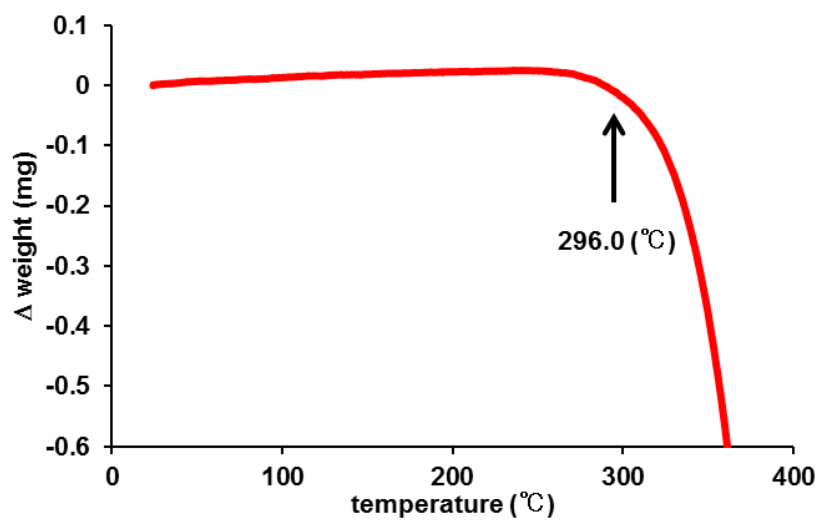

## 11. UV—Vis and PL spectra of **1** in $\text{CH}_2\text{Cl}_2$

Figure S30. UV—Vis absorption spectra of **1** in  $\text{CH}_2\text{Cl}_2$  ( $10^{-4}$  to  $10^{-5}$  mol/L)

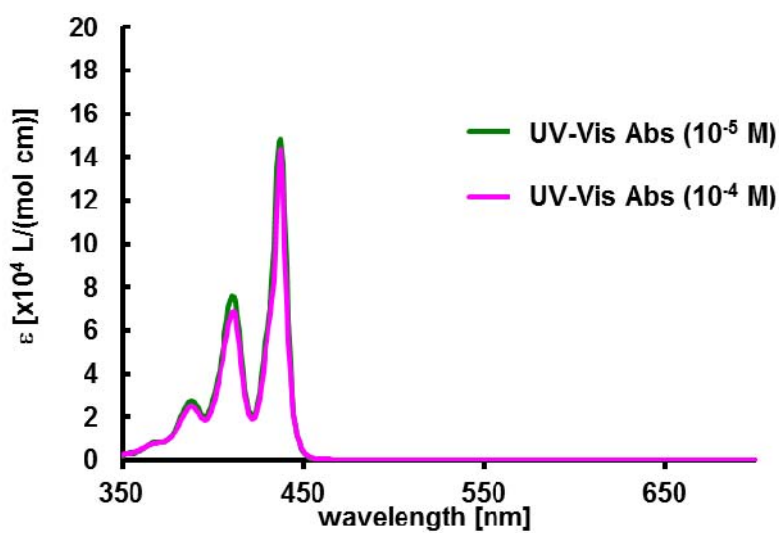

**Figure S31.** PL spectra of **1** in CH<sub>2</sub>Cl<sub>2</sub> (10<sup>-2</sup> to 10<sup>-5</sup> mol/L)

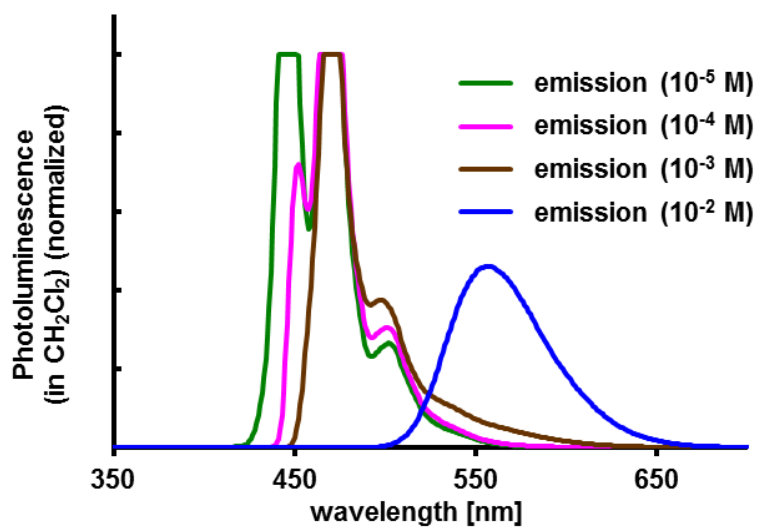

## 12. Microscopic observations of O<sub>C</sub>-form on heating

**Figure S32.** Microscopic observations of **O<sub>C</sub>-form** on heating

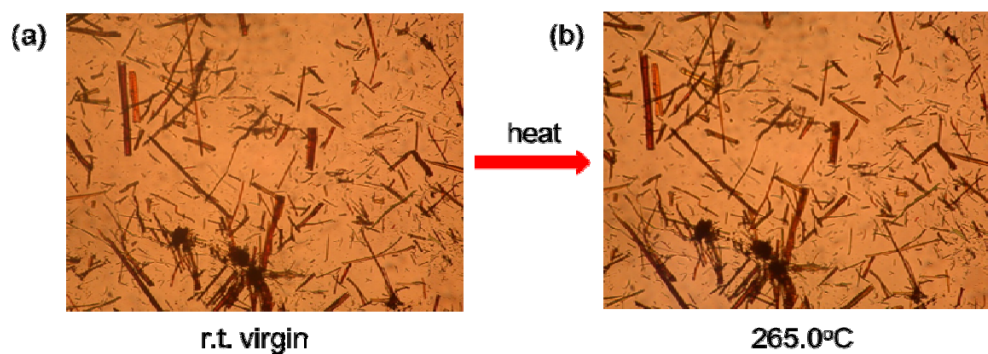

(a) orange needles of **O<sub>C</sub>-form** which were obtained by reprecipitation from hexane

(b) orange needles of **O<sub>C</sub>-form** which were heated at 265 °C

The microscopic observations showed no change of orange needles of the **O<sub>C</sub>-form** on heating up to 265 °C.

### 13. XRD analyses and microscopic observations of O<sub>K</sub>-form on heating

Figure S33. XRD profiles of O<sub>K</sub>-form on heating

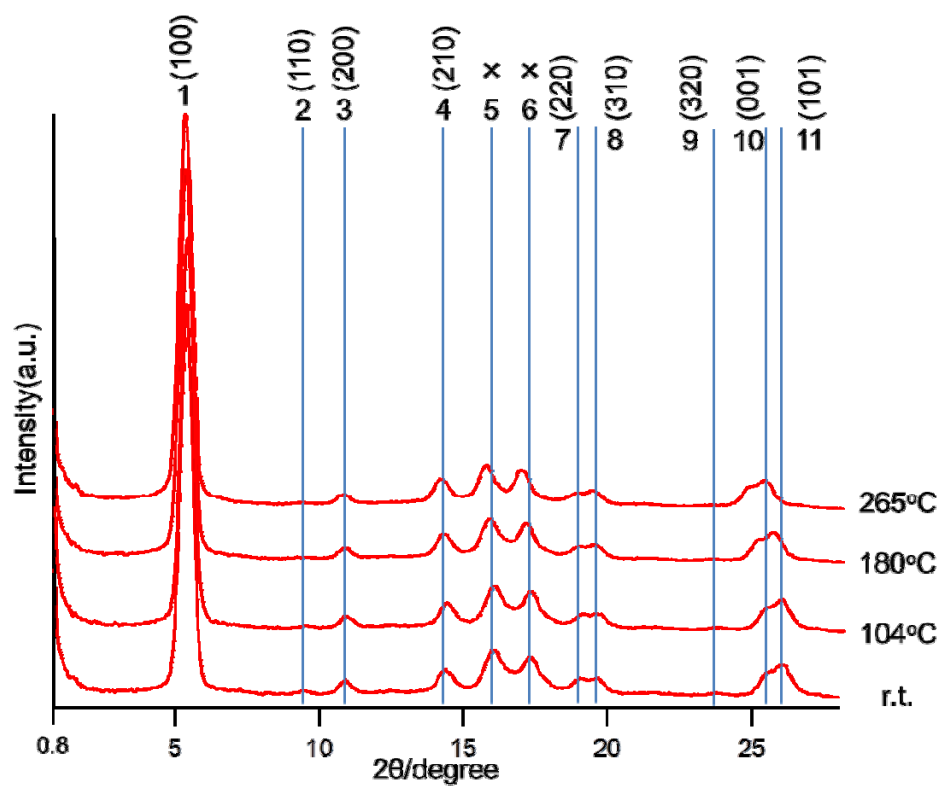

When the **OK-form** was heated, XRD analyses demonstrated that the peaks no. 5,6,10 and 11 were shifted to the lower angle region.



Figure S34. Microscopic observations of **O<sub>K</sub>-form** on heating

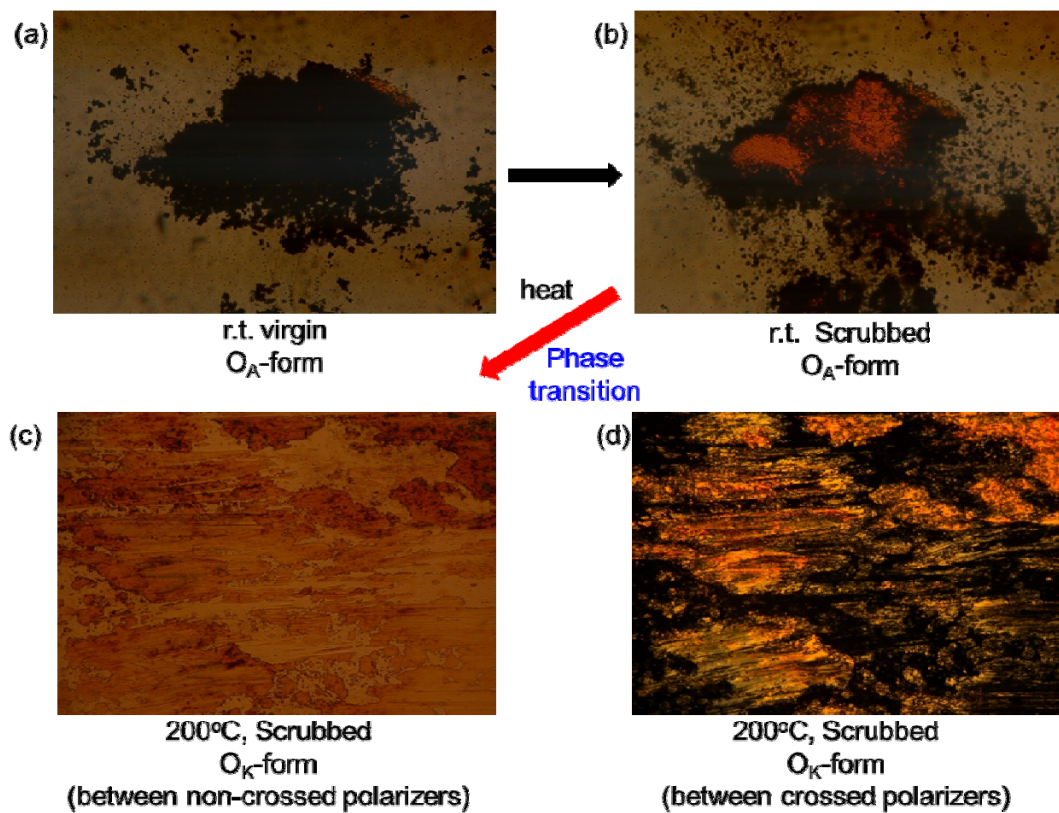

(a) **O<sub>A</sub>-form** at rt

(b) **O<sub>A</sub>-form** scrubbed between the cover glasses at rt

On heating, the **O<sub>A</sub>-form** underwent a phase transition to **O<sub>K</sub>-form**.

(c) **O<sub>K</sub>-form** scrubbed between the cover glasses at 200 °C (between non-crossed polarizers)

(d) **O<sub>K</sub>-form** scrubbed between the cover glasses at 200 °C (between crossed polarizers)

**O<sub>K</sub>-form** was softer than **O<sub>A</sub>-form**, and **O<sub>K</sub>-form** was expanded between the glasses by scrubbing.

#### 14. References of Supporting Information and NMR charts of 1

- S1) H. Maeda, T. Maeda, K. Mizuno, K. Fujimoto, H. Shimizu, M. Inouye, *Chem. Eur. J.* 2006, **12**, 824.
- S2) M. Takezaki, T. Tominaga, *J. Photochem. Photobiol. A*, 2005, **174**, 113.

Figure S35. NMR charts of 1 (CDCl<sub>3</sub>)

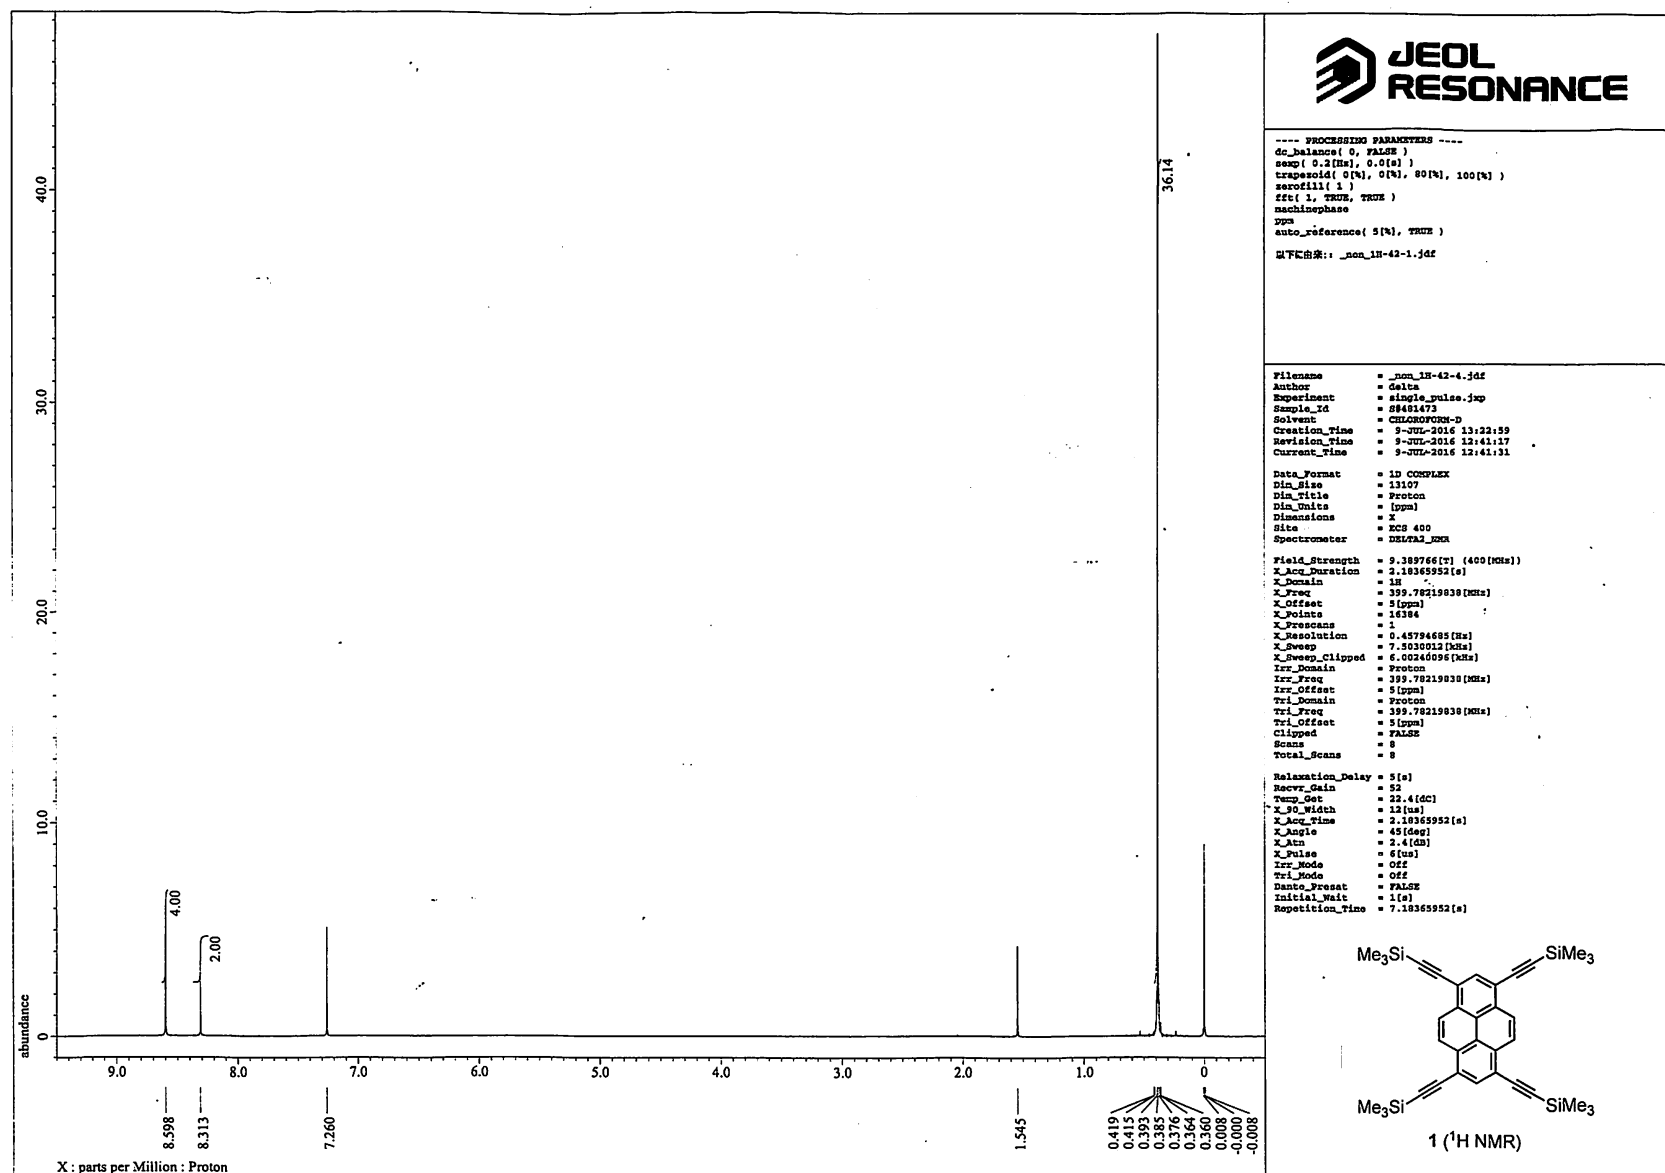

Figure S35. NMR charts of 1 (CDCl<sub>3</sub>)

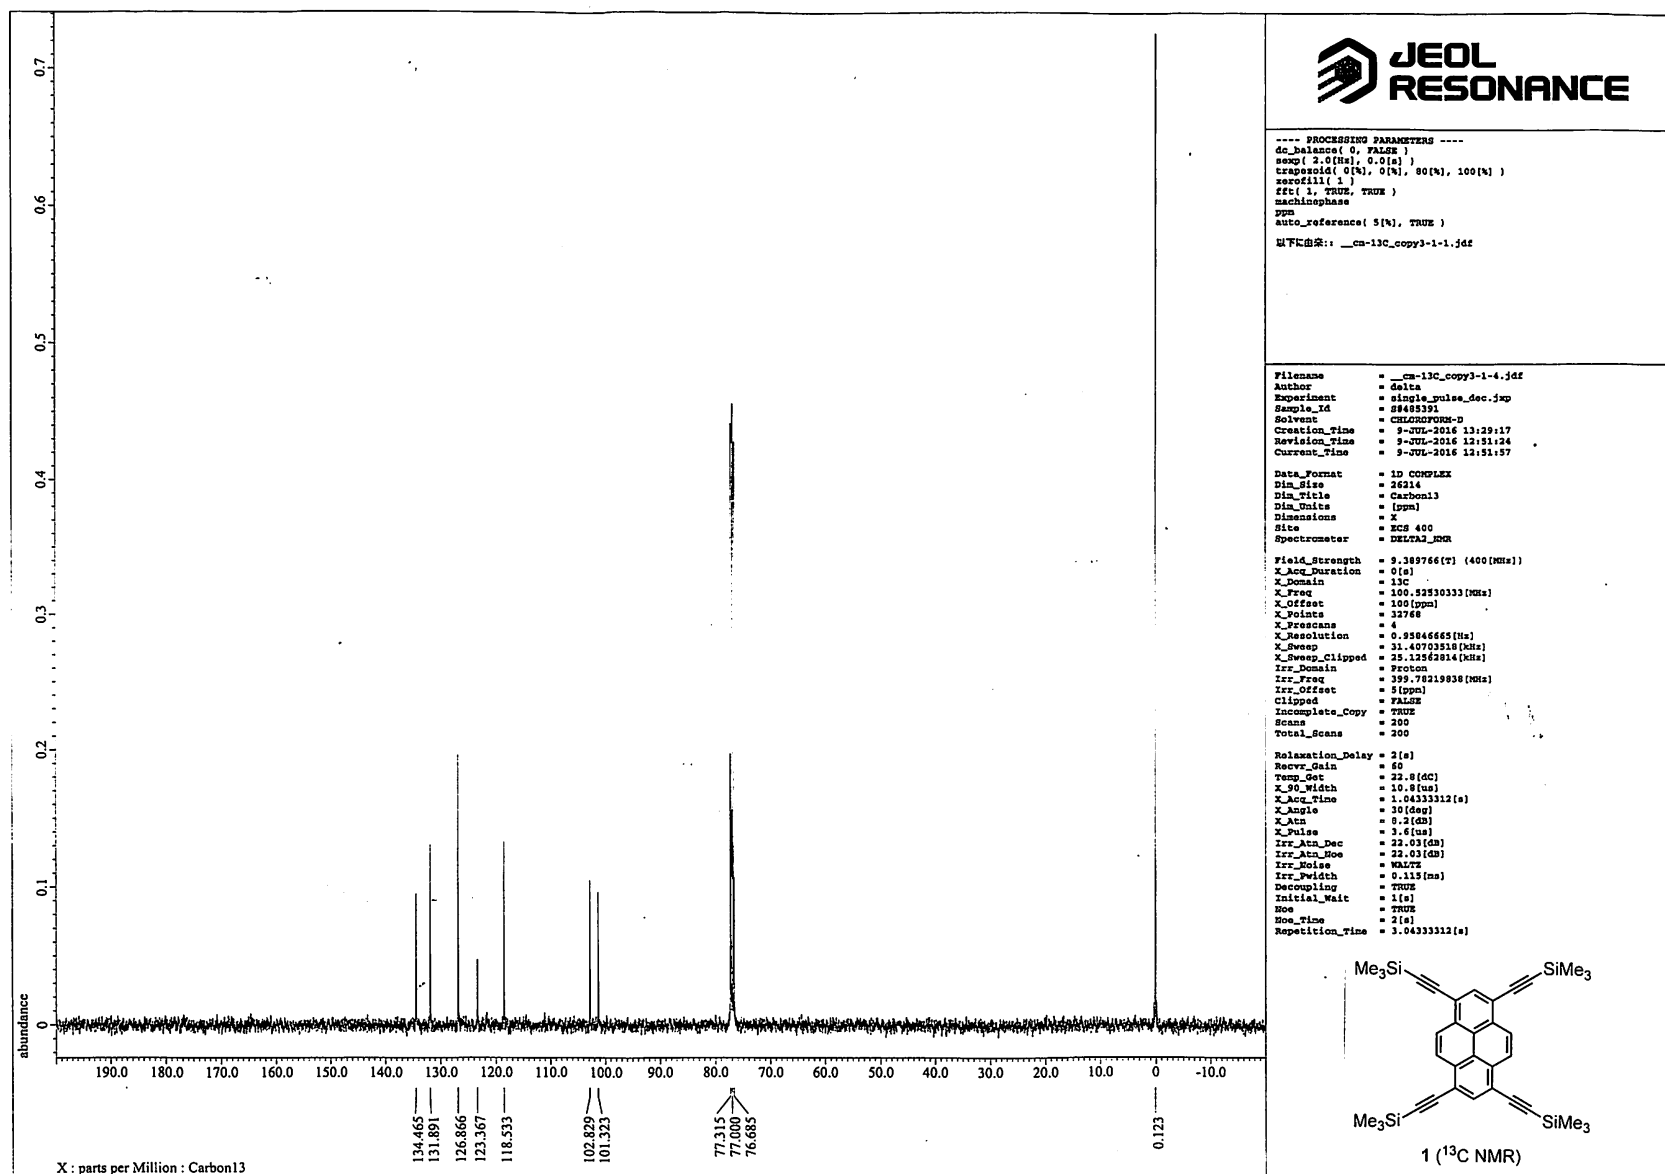

Supplement: Supplementary file 1 [file 7362937]
